# Supplementary material for: Safety and PCR monitoring in 161 semi-immune Kenyan adults following controlled human malaria infection
Source: PubMed Central journal article supplement (PMC8492329; doi:10.1172/jci.insight.146443), 2021-09-08
Supplement: jciinsight-6-146443-s133.pdf [file jciinsight-6-146443-s133.pdf]

## Supplementary Data

**Supplementary Table 1. Laboratory reference ranges with grading criteria**

| Parameter                                         | Reference ranges | Grade 1 (Mild)              | Grade 2 (Moderate)          | Grade 3 (Severe)            | Grade 4 (Potentially life threatening) |
|---------------------------------------------------|------------------|-----------------------------|-----------------------------|-----------------------------|----------------------------------------|
| <b>HAEMATOLOGY – Adult Male</b>                   |                  |                             |                             |                             |                                        |
| Hemoglobin-Hb (Low) g/dL                          | 10.6-17.0        | 10.0-<10.6                  | 9-<10.0                     | 7.0-< 9.0                   | <7.0 with clinical signs               |
| Lymphocytes (Low) ( $\times 10^3$ cells/ $\mu$ l) | 1.2-3.5          | 0.6 - < 1.2                 | 0.5-<0.6                    | 0.35-<0.5                   | < 0.35                                 |
| Neutrophils ( $\times 10^3$ cells/ $\mu$ l)       | 0.9-7.7          | 0.8-<0.9                    | 0.6-0.799                   | 0.4-0.599                   | <0.4                                   |
| WBC (low) ( $\times 10^3$ cells/ $\mu$ l)         | 3.0-10.1         | 2.0-<3.0                    | 1.5-1.9                     | 1.0-1.4                     | <1                                     |
| PLT ( $\times 10^3$ cells/ $\mu$ l)               | 139-398          | 100-<139                    | 50-<100                     | 25-<50                      | <25                                    |
| <b>HAEMATOLOGY – Adult Female</b>                 |                  |                             |                             |                             |                                        |
| Hb (Low) g/dL                                     | 8.0-14.9         | 7-<8                        | 6-<7                        | 5- 6                        | <5 with clinical signs                 |
| Lymphocytes ( $\times 10^3$ cells/ $\mu$ l)       | 1.3 – 3.5        | 0.6-<1.3                    | 0.5-<0.6                    | 0.35-<0.5                   | < 0.35                                 |
| Neutrophils ( $\times 10^3$ cells/ $\mu$ l)       | 1.1-5.3          | 0.8-1.1                     | 0.6-0.799                   | 0.4-0.599                   | <0.4                                   |
| WBC ( $\times 10^3$ cells/ $\mu$ l)               | 3.3-8.6          | 2.0-<3.3                    | 1.5-1.9                     | 1.0-1.4                     | < 1                                    |
| PLT ( $\times 10^3$ cells/ $\mu$ l)               | 166-456          | 100-< 166                   | 50-<100                     | 25-<50                      | <25                                    |
| <b>BIOCHEMISTRY – Adult Male</b>                  |                  |                             |                             |                             |                                        |
| Sodium (mmol/L) Low                               | 135-145          | 130 to < 135                | 125-<130                    | 121-<125                    | $\leq 120$                             |
| Sodium (mmol/L) High                              | 135-145          | 146-150                     | 150-154                     | 154-160                     | $\geq 160$                             |
| Potassium (mmol/L) Low                            | 3.5-4.5          | 3.0-<3.4                    | 2.5-<3.0                    | 2.0-<2.5                    | <2.0                                   |
| Potassium (mmol/L) High                           | 3.5-4.5          | 4.5-<6.0                    | 6.0-<6.5                    | 6.5-<7.0                    | $\geq 7.0$                             |
| Urea (mmol/L) – Do not grade                      | 2.1-7.1          |                             |                             |                             |                                        |
| Creatinine ( $\mu$ mol/L) High                    | 44-111           | >111-144<br>1.1-1.3 X ULN   | >144-199<br>>1.3-1.8 X ULN  | 199-<389<br>>1.8-<3.5 X ULN | $\geq 388 \geq 3.5$ X ULN              |
| ALT (IU/L)                                        | 11-80            | >80-<200<br>1.25-<2.5 X ULN | 200-<400<br>2.5-<5.0 ULN    | 400-<800<br>5.0-<10.0 ULN   | $\geq 800$<br>$\geq 10.0$ X ULN        |
| <b>BIOCHEMISTRY – Adult Female</b>                |                  |                             |                             |                             |                                        |
| Sodium mmol/ (Low)                                | 135-145          | 130-<135                    | 125-<130                    | 121-<125                    | $\leq 120$                             |
| Sodium mmol/L (High)                              | 135 145          | >145-<150                   | 150-<154                    | 154-<160                    | $\geq 160$                             |
| Potassium mmol/L                                  | 3.4-4.4          | 3.0-<3.4                    | 2.5-<3.0                    | 2.0-< 2.5                   | < 2.0                                  |
| Urea (mmol/L) – Do not grade                      | 2.1-7.1          |                             |                             |                             |                                        |
| Creatinine ( $\mu$ mol/L) (High)                  | 37-92            | >92-<119<br>1-1.3 X ULN     | >119-<166<br>>1.3-1.8 X ULN | >166-322<br>>1.8-<3.5ULN    | $\geq 322$<br>$\geq 3.5$ X ULN         |
| ALT (IU/L)                                        | 8-55             | >55-<138<br>1< 2.5 ULN      | 138-<275<br>2.5-<5.0 x ULN  | 275-<550<br>5.0-10 X ULN    | $\geq 550$<br>$\geq 10.0$ X ULN        |

\*'Low' refers to values below to the lower normal limit range; 'High' refers to values above the upper normal limit range

**Supplementary Table 2. Overall Concomitant Medication Use based on location**

|                         | <b>Kilifi North (N=34)</b> | <b>Kilifi South (N=112)</b> | <b>Ahero (N=15)</b> | <b>Total (N=161)</b> |
|-------------------------|----------------------------|-----------------------------|---------------------|----------------------|
| Amoxicillin             | 3 (8.8)                    | 11 (9.8)                    | 2 (13.3)            | 16 (9.9)             |
| Amoxicillin/Clavulanate | 0                          | 1 (0.9)                     | 0                   | 1 (0.6)              |
| Antacid                 | 0                          | 4 (3.6)                     | 0                   | 4 (2.5)              |
| Antihistamine           | 2 (5.9)                    | 4 (3.6)                     | 2 (13.3)            | 8 (5)                |
| Ceftriaxone             | 0                          | 1 (0.9)                     | 0                   | 1 (0.6)              |
| Clotrimazole            | 4 (11.8)                   | 9 (8)                       | 0                   | 13 (8.1)             |
| Diclofenac              | 0                          | 1 (0.9)                     | 0                   | 1 (0.6)              |
| Diclofenac Gel          | 0                          | 7 (6.3)                     | 0                   | 7 (4.3)              |
| Ibuprofen               | 10 (29.4)                  | 13 (11.6)                   | 1 (6.7)             | 24 (14.9)            |
| Nystatin Oral Drops     | 1 (2.9)                    | 1 (0.9)                     | 1 (6.7)             | 3 (1.9)              |
| ORS                     | 0                          | 3 (2.7)                     | 0                   | 3 (1.9)              |
| Paracetamol             | 21 (61.8)                  | 39 (34.8)                   | 11 (73.3)           | 71 (44.1)            |

Data are presented as n (%) or otherwise specified. ORS, oral rehydration salts.

**Supplementary Table 3 Abnormal laboratory result summaries and severity grades**

|                   | <b>Grade</b>   | <b>C-1*</b> | <b>8 to DoD*</b> | <b>DoD to Exit*</b> | <b>LTFU**</b> |
|-------------------|----------------|-------------|------------------|---------------------|---------------|
| ALT (Low)         | 1              | 0           | 1 (0.6)          | 2 (1.2)             | 0             |
| ALT (High)        | 1              | 2 (1.2)     | 45 (28)          | 34 (21.1)           | 0             |
|                   | 2              | 0           | 7 (4.3)          | 5 (3.1)             | 0             |
| Creatinine (Low)  | 1              | 0           | 1 (0.6)          | 1 (0.6)             | 0             |
| Creatinine (High) | 1              | 9 (5.6)     | 33 (20.5)        | 23 (14.3)           | 3 (8.6)       |
| Bilirubin (Low)   |                | 5(3.1)      | 18(11.2)         | 10(6.2)             | 2(5.7)        |
| Bilirubin (High)  |                | 3(1.9)      | 2(1.2)           | 1(0.6)              | 1(2.9)        |
| Albumin (Low)     |                | 3(1.9)      | 10(6.2)          | 9(5.6)              | 0             |
| Albumin (High)    |                | 21(13)      | 16(9.9)          | 25(15.5)            | 0             |
| Potassium (Low)   | 1              | 22 (13.7)   | 21 (13.0)        | 16 (9.9)            | 8 (5.0)       |
|                   | 2              | 2 (1.2)     | 0                | 0                   | 0             |
| Potassium (High)  | 1              | 4 (2.5)     | 16 (9.9)         | 9 (5.6)             | 0             |
| Sodium (Low)      | 1              | 0           | 25 (15.5)        | 33 (20.5)           | 11 (31.4)     |
| Urea (Low)        |                | 6 (3.7)     | 2 (1.2)          | 3 (1.9)             | 1 (2.9)       |
| Hb (Low)          | 1              | 1 (0.6)     | 1 (0.6)          | 0                   | 0             |
|                   | 3              | 1 (0.6)     | 0                | 0                   | 0             |
| Hb (High)         |                | 4 (2.5)     | 2 (1.2)          | 4 (2.5)             | 0             |
| Platelets (Low)   | 1              | 7 (4.3)     | 11 (6.8)         | 20 (12.4)           | 8 (24.2)      |
|                   | 2              | 0           | 1 (0.6)          | 2 (1.2)             | 1 (3)         |
|                   | 3              | 0           | 1 (0.6)          | 1 (0.6)             | 0             |
|                   | 4 <sup>†</sup> | 0           | 1 (0.6)          | 1 (0.6)             | 0             |
| Platelets (High)  |                | 6 (3.7)     | 5 (3.1)          | 6 (3.7)             | 0             |
| WBC (Low)         | 1              | 1 (0.6)     | 4 (2.5)          | 6 (3.7)             | 1 (3)         |
| WBC (High)        | 0              | 4 (2.5)     | 18 (11.2)        | 19 (11.8)           | 0             |

C-1 refers to a day before challenge; 8-DoT refer to days after challenge; DoT-Exit refers to period of observed treatment to in-patient exit; LTFU refers to long term follow up; \*Percentages expressed over total subjects challenged (N=161); \*\*Percentages expressed over number of subjects followed up for each respective parameter – chemistry (N=35) and haematology (N=33); Duration to normal ALT levels: median 14 days (min 2 days and max 67 days); <sup>†</sup>Grade 4 low platelet reading was  $22 \times 10^3$  cells/ $\mu$ l on days 22 and 24 with duration to normal levels: median 11 days (min 2 days and max 71 days). ‘Low’ refers to values below to the lower normal limit range; ‘High’ refers to values above the upper normal limit range

**Supplementary Table 4: qPCR outcomes by location after exclusion of all volunteers with any detectable lumefantrine levels**

|                       | <b>Nairobi (N=28)</b> | <b>Ahero (N=7)</b> | <b>Kilifi North (N=27)</b> | <b>Kilifi South (N=40)</b> |
|-----------------------|-----------------------|--------------------|----------------------------|----------------------------|
| PCR (-)               | 0% (0/28)             | 14.3% (1/7)        | 7.4% (2/27)                | 17.5% (7/40)               |
| Treated, febrile      | 10.7% (3/28)          | 14.3% (1/7)        | 51.9% (14/27)              | 7.5% (3/40)                |
| Treated, non-febrile  | 85.7% (24/28)         | 14.3% (1/7)        | 37.0% (10/27)              | 5.0% (2/40)                |
| Untreated but PCR (+) | 3.6% (1/28)           | 57.1% (4/7)        | 3.7 (1/27)                 | 70.5% (28/40)              |

Data are presented as % and (n/N) or otherwise specified. PCR (-) refers to PCR negative; PCR (+) refers to PCR positive.

## **Supplementary figure legends**

### **Supplementary Figure 1 Plasma ALT concentration over time based on gender.**

Plasma samples one day before challenge (C-1), days 10 or 22 or day of treatment (DoT), and day 36 after challenge including a sample taken after late follow up were analysed for ALT concentrations (IU/L) based on gender. Volunteers (N=142) were inoculated on C1 and followed over time. LFTU refers to long term follow up.

### **Supplementary Figure 2 Anti-malarial drug concentrations based on treatment outcome.**

Plasma samples taken from volunteers one day before challenge (C-1) and seven days after challenge (C+8) were analysed for the anti-malarials: (A) chloroquine; (B) lumefantrine; (C) sulphadoxine; and (D) pyrimethamine. The red horizontal line represents the minimum inhibitory concentration for therapeutic efficacy for each respective drug. Treatment Required refers to whether volunteers were treated before C+22 (Yes) or on C+22 (No). Artemether and dihydroartemisinin levels were all undetectable.

### **Supplementary Figure 3 Individual qPCR results based on volunteer outcome and location**

Blood samples from C+8 to C+22 after CHMI were used for qPCR from: (A) Nairobi – N=28; (B) Kilifi North – N=34; (C) Kilifi South – N=93; and (D) Ahero – N=15. Parasitaemia was determined by asexual *18S* ribosomal RNA gene qPCR for each volunteer (limit of detection 20 parasites/ml). Blue lines represent individuals who required treatment and reached treatment threshold (reached DoT); green lines represent individuals who did not meet criteria for treatment threshold but were qPCR positive; orange lines represent individuals who were qPCR negative throughout monitoring; and red dot denotes individuals were febrile and met treatment

criteria. Shown are each of the 142 volunteers with their respective subject identification numbers.

#### **Supplementary Figure 4 Individual qPCR results based on volunteer outcome and cohort**

Blood samples from C+8 after inoculation were used to determine estimated parasite density from each volunteer enrolled into the cohorts: (A) 2016 – N=36; (B) 2017 – N=53; and (C) 2018 – N=93. Parasitaemia was determined by asexual *Plasmodium 18S* ribosomal RNA gene qPCR for each volunteer. Blue lines represent individuals who required treatment and reached treatment threshold (reached DoT); green lines represent individuals who did not meet criteria for treatment threshold but were qPCR positive; orange lines represent individuals who were qPCR negative throughout monitoring; and red dot denotes individuals who were febrile and met treatment criteria. Shown are each of the 142 volunteers with their respective subject identification numbers.

#### **Supplementary Figure 5 Matrix correlation for qPCR and qRT-PCR assay comparisons**

Blood samples from 20 volunteers from the 2018 cohort representing six time points (C+8 to C+10.5) after inoculation were used to estimate parasitaemia using *Plasmodium 18S* rRNA gene qPCR assays from Kilifi and Mahidol University (MU) and *18S* rRNA qRT-PCR from the University of Washington (UW). Shown are Spearman correlation comparing the respective assays. Units on both axes are estimated parasites/mL. Negative results are displayed at the LOD for each assay (Kilifi 20 parasites/mL, UW 1 parasite/mL, MU 10 parasites/mL).

#### **Supplementary Figure 6 Individual qPCR and qRT-PCR post-challenge results**

Blood samples from 20 volunteers from the 2018 cohort representing six time points (C+8 to C+10.5) after inoculation were used to determine parasitaemia using the *Plasmodium 18S*

rRNA gene qPCR assays from Kilifi (green) and Mahidol (orange), and the *Plasmodium 18S* rRNA qRT-PCR from Washington (blue). Shown are each of the 20 volunteers with their respective subject identification numbers. Negative results are shown at 10 (Kilifi), 0.05 (MU) and 0.005 (UW) parasites/ml in order to graph separate lines.

### **Supplementary Figure 7 ALT concentration over time based on qPCR status**

Plasma samples a day before challenge (C-1), Days 10 or 22 or day of treatment (DoT), and Day 36 after challenge including a sample taken after late follow-up were analysed for ALT concentrations (IU/L) based on qPCR status. Volunteers were inoculated on C1 and followed over time and exited the study at C+36.

### **Data availability**

Volunteer data will be deposited into the KWTRP Harvard Dataverse repository and made available including data dictionaries after de-identification of the volunteer data that represent the results reported in this article. The data will be available to researchers who will need to submit proposals to [dgc@kemri-wellcome.org](mailto:dgc@kemri-wellcome.org) to gain access to the data following a signed data access agreement. The study protocol, informed consent forms, and all other associated documents have been previously published.

## Supplemental Acknowledgements: Members of the CHMI-SIKA Study Team

| First Initials | Surname                    |
|----------------|----------------------------|
| A. I.          | Abdi <sup>1</sup>          |
| Y.             | Abebe <sup>2</sup>         |
| A.             | Audi <sup>3</sup>          |
| P.             | Bejon <sup>1,4</sup>       |
| P. C.          | Bull <sup>5</sup>          |
| P. C.          | Che <sup>1</sup>           |
| K. P.          | Cruz <sup>6</sup>          |
| Z.             | de Laurent <sup>1</sup>    |
| S. H.          | Hodgson <sup>7</sup>       |
| S. L.          | Hoffman <sup>2</sup>       |
| E.R.           | James <sup>2</sup>         |
| I.             | Jao <sup>1</sup>           |
| D.             | Kamuya <sup>1</sup>        |
| S.             | Kariuki <sup>1</sup>       |
| N.             | Kibinge <sup>1</sup>       |
| R.             | Kimathi <sup>1</sup>       |
| S.             | Kinyanjui <sup>1,4,8</sup> |
| C.             | Kivisi <sup>8</sup>        |
| N.             | Koskei <sup>3</sup>        |
| M.             | Imwong <sup>9</sup>        |
| J.             | Makale <sup>1</sup>        |
| K.             | Marsh <sup>1,4</sup>       |
| V.             | Marsh <sup>1,4</sup>       |
| K. S.          | Mohammed <sup>1</sup>      |
| M.             | Mosobo <sup>1</sup>        |
| S. C.          | Murphy <sup>6</sup>        |
| J.             | Musyoki <sup>1</sup>       |
| M.             | Muthui <sup>1</sup>        |
| J.             | Mwacharo <sup>1</sup>      |
| K.             | Mwai <sup>1,10</sup>       |
| D.             | Mwanga <sup>1</sup>        |
| I.             | Nkumama <sup>1,11</sup>    |
| F.M            | Ndungu <sup>1,4</sup>      |
| M.             | Njue <sup>1</sup>          |
| G.             | Nyangweso <sup>1</sup>     |
| D.             | Odera <sup>1,11</sup>      |
| B.             | Ogutu <sup>3,12</sup>      |
| F.             | Olewe <sup>3,12</sup>      |
| J.             | Oloo <sup>3</sup>          |
| D.             | Omuoyo <sup>1</sup>        |
| J.             | Ongecha <sup>3,12</sup>    |
| M. O.          | Ongas <sup>3,12</sup>      |
| M.             | Ooko <sup>1</sup>          |
| N.             | Smith <sup>6</sup>         |
| F.             | Osier <sup>1,11</sup>      |



| First Initials | Surname                    |
|----------------|----------------------------|
| T. L.          | Richie <sup>2</sup>        |
| A. M.          | Seilie <sup>6</sup>        |
| J.             | Shangala <sup>1</sup>      |
| B. K. L.       | Sim <sup>2</sup>           |
| B.             | Sriburin <sup>13</sup>     |
| J.             | Tarning <sup>4,13</sup>    |
| J.             | Tuju <sup>1</sup>          |
| J.             | Wambua <sup>1</sup>        |
| T. N.          | Williams <sup>1,14</sup>   |
| M.             | Winterberg <sup>4,13</sup> |

## Affiliations

<sup>1</sup>KEMRI-Wellcome Trust Research Programme, Kilifi, Kenya

<sup>2</sup>Sanaria Inc., Rockville, MD, USA

<sup>3</sup>Centre for Clinical Research, Kenya Medical Research Institute, Kisumu, Kenya

<sup>4</sup>Centre for Tropical Medicine and Global Health, Nuffield Department of Medicine, University Oxford, Oxford, UK

<sup>5</sup>Department of Pathology, University of Cambridge, Cambridge, UK

<sup>6</sup> Departments of Laboratory Medicine and Microbiology and Center for Emerging and Re-emerging Infectious Diseases, University of Washington, Seattle, Washington, USA

<sup>7</sup>The Jenner Institute, University of Oxford, Oxford, UK.

<sup>8</sup>Pwani University, P. O. Box 195-80108, Kilifi, Kenya

<sup>9</sup>Faculty of Tropical Medicine, Department of Molecular Tropical Medicine and Genetics, Mahidol University, Bangkok, Thailand

<sup>10</sup>Epidemiology and Biostatistics Division, School of Public Health, University of the Witwatersrand, Johannesburg, South Africa.

<sup>11</sup>Centre for Infectious Diseases, Heidelberg University Hospital, Heidelberg, Germany

<sup>12</sup>Center for Research in Therapeutic Sciences, Strathmore University, Nairobi, Kenya

<sup>13</sup>Mahidol-Oxford Tropical Medicine Research Unit, Mahidol University, Bangkok, Thailand

<sup>14</sup>Department of Medicine, Imperial College, London, UK
